# Supplementary material for: Employment Among US Hispanics: a Tale of Three Generations
Source: Springer Nature journal article supplement (doi:10.1007/s41996-018-0021-9), 2018-10-24
Supplement: 41996_2018_21_MOESM1_ESM.pdf [file 41996_2018_21_MOESM1_ESM.pdf]

**Online Appendix Table A1: Detailed Results for Table 2**  
**Decomposition Results for Male Employment Gap Relative to Non-Hispanic Whites**

|                                     | Hispanic<br>Immigrants | Hispanic<br>2 <sup>nd</sup> gen. | Hispanic<br>3 <sup>rd</sup> + gen. | Non-Hispanic<br>Blacks |
|-------------------------------------|------------------------|----------------------------------|------------------------------------|------------------------|
| Employment gap                      | 0.018***               | -0.021***                        | -0.067***                          | -0.142***              |
| Due to differences in means:        |                        |                                  |                                    |                        |
| Age                                 | -0.058***              | -0.029***                        | -0.037***                          | -0.049***              |
| Education                           | 0.015***               | 0.022***                         | 0.011***                           | 0.005***               |
| Less than HS diploma                | -0.073***              | -0.026***                        | -0.033***                          | -0.026***              |
| HS diploma                          | -0.048***              | -0.014***                        | -0.017***                          | -0.010***              |
| Some college                        | 0.0002                 | 0.0001                           | 0.0005***                          | 0.001***               |
| College graduate                    | -0.005***              | 0.001***                         | 0.0004                             | 0.001**                |
| Marital status and kids             | -0.020***              | -0.013***                        | -0.017***                          | -0.017***              |
| Married                             | -0.008***              | -0.011**                         | -0.005**                           | -0.003**               |
| Divorced                            | 0.004***               | -0.010***                        | -0.008***                          | -0.017***              |
| Widowed                             | -0.0003**              | -0.0003***                       | -0.0001                            | 0.0001                 |
| Separated                           | 0.0001***              | 0.0002***                        | 0.0001                             | -0.0002***             |
| Never married                       | -0.0001                | -0.0001                          | -0.0001**                          | -0.0002*               |
| Number of kids age 6+ at home       | -0.0003                | -0.004***                        | -0.003***                          | -0.006***              |
| Number of kids under age 6 at home  | 0.005***               | 0.0003                           | 0.002***                           | -0.001***              |
| Economic conditions                 | 0.0002**               | 0.0002**                         | 0.0001                             | 0.0001                 |
| Unemployment rate                   | -0.006***              | -0.011**                         | -0.006**                           | -0.004**               |
| Unemployment rate                   | -0.007**               | -0.009**                         | -0.004                             | -0.003**               |
| Due to differences in coefficients: |                        |                                  |                                    |                        |
| Age                                 | 0.075***               | 0.008**                          | -0.030**                           | -0.093***              |
| Education                           | -0.0001                | 0.001                            | 0.003**                            | 0.001***               |
| Less than HS diploma                | 0.027***               | -0.005***                        | -0.004***                          | 0.0003***              |
| HS diploma                          | 0.049***               | 0.007***                         | 0.001                              | -0.006***              |
| Some college                        | -0.004***              | -0.005***                        | -0.005***                          | -0.008***              |
| College graduate                    | -0.008***              | -0.003                           | -0.002                             | 0.005***               |
| Marital status and kids             | -0.011***              | -0.004***                        | 0.002                              | 0.010***               |
| Married                             | -0.036***              | -0.007                           | -0.001                             | -0.003                 |
| Divorced                            | -0.031                 | -0.003                           | 0.007                              | 0.011***               |
| Widowed                             | -0.0002                | 0.001                            | 0.003***                           | 0.0004                 |
| Separated                           | 0.0001                 | 0.0001                           | -0.0001                            | 0.0001                 |
| Never married                       | 0.0002                 | -0.0001                          | -0.0002                            | -0.0002                |
| Number of kids age 6+ at home       | 0.006***               | -0.004                           | -0.008**                           | -0.011***              |
| Number of kids under age 6 at home  | -0.012***              | -0.003                           | -0.002                             | -0.003**               |
| Economic conditions                 | 0.001                  | 0.003                            | -0.001                             | -0.0003                |
| Unemployment rate                   | 0.010                  | 0.029**                          | 0.021                              | -0.057*                |
| Unemployment rate                   | 0.008                  | 0.028**                          | 0.022                              | -0.057*                |
| Constant                            | 0.074***               | -0.010                           | -0.050                             | -0.033                 |

\* p < 0.1; \*\* p < 0.05; \*\*\* p < 0.01

Note: Shown are results from Oaxaca decompositions of the employment gap between the indicated group and 3<sup>rd</sup>+ generation non-Hispanic whites. Models also include 25 age dummy variables and 264 time effects.

**Online Appendix Table A2: Detailed Results for Table 3**  
**Decomposition Results for Female Employment Gap Relative to Non-Hispanic Whites**

|                                     | Hispanic<br>Immigrants | Hispanic<br>2 <sup>nd</sup> gen. | Hispanic<br>3 <sup>rd</sup> + gen. | Non-Hispanic<br>Blacks |
|-------------------------------------|------------------------|----------------------------------|------------------------------------|------------------------|
| Employment gap                      | -0.183***              | -0.032***                        | -0.070***                          | -0.047***              |
| Due to differences in means:        |                        |                                  |                                    |                        |
| Age                                 | -0.145***              | -0.048***                        | -0.058***                          | -0.033***              |
| Education                           | 0.009***               | 0.016***                         | 0.009***                           | 0.005***               |
| Less than HS diploma                | -0.119***              | -0.035***                        | -0.052***                          | -0.033***              |
| HS diploma                          | -0.079***              | -0.022***                        | -0.029***                          | -0.015***              |
| Some college                        | 0.0001                 | -0.0002                          | 0.0004**                           | 0.0003***              |
| College graduate                    | -0.010***              | 0.002**                          | 0.0004                             | 0.002***               |
| College graduate                    | -0.030***              | -0.015***                        | -0.025***                          | -0.020***              |
| Marital status and kids             | -0.026***              | -0.018***                        | -0.010***                          | -0.002                 |
| Married                             | -0.0001                | 0.0001                           | -0.0002                            | -0.002***              |
| Divorced                            | -0.002***              | -0.001***                        | 0.0003                             | 0.001***               |
| Widowed                             | 0.0001*                | 0.0003***                        | -0.0001                            | -0.001***              |
| Separated                           | 0.001***               | 0.0001                           | -0.0001                            | -0.0001                |
| Never married                       | 0.0001*                | 0.001***                         | 0.001**                            | 0.001                  |
| Number of kids age 6+ at home       | -0.011***              | -0.004***                        | -0.006***                          | -0.002***              |
| Number of kids under age 6 at home  | -0.014***              | -0.014***                        | -0.005***                          | 0.002***               |
| Economic conditions                 | -0.009**               | -0.011**                         | -0.005                             | -0.003**               |
| Unemployment rate                   | -0.009**               | -0.010*                          | -0.004                             | -0.003**               |
| Due to differences in coefficients: |                        |                                  |                                    |                        |
| Age                                 | -0.038***              | 0.017**                          | -0.012                             | -0.014*                |
| Education                           | -0.002**               | -0.003                           | 0.002                              | 0.0004                 |
| Less than HS diploma                | 0.013*                 | -0.005***                        | -0.002**                           | -0.003**               |
| HS diploma                          | 0.035***               | 0.005***                         | 0.0003                             | -0.001                 |
| Some college                        | -0.008***              | -0.008***                        | -0.004***                          | -0.010***              |
| College graduate                    | -0.004***              | -0.001                           | -0.001                             | -0.0003                |
| College graduate                    | -0.010***              | 0.0001                           | 0.002                              | 0.008***               |
| Marital status and kids             | -0.070***              | 0.003                            | 0.013*                             | 0.038***               |
| Married                             | -0.072***              | -0.017                           | 0.004                              | 0.016***               |
| Divorced                            | 0.002**                | 0.002                            | 0.002*                             | 0.0002                 |
| Widowed                             | 0.0001                 | -0.0001                          | 0.0001                             | -0.001**               |
| Separated                           | 0.003***               | 0.002*                           | -0.0001                            | -0.0002                |
| Never married                       | 0.001*                 | -0.003                           | -0.005*                            | -0.007***              |
| Number of kids age 6+ at home       | -0.001                 | 0.009***                         | 0.007***                           | 0.018***               |
| Number of kids under age 6 at home  | -0.004***              | 0.010***                         | 0.005***                           | 0.011***               |
| Economic conditions                 | 0.064                  | 0.080***                         | 0.042                              | -0.008                 |
| Unemployment rate                   | 0.064                  | 0.083***                         | 0.043                              | -0.008                 |
| Constant                            | -0.042                 | -0.060**                         | -0.067                             | -0.071                 |

\* p < 0.1; \*\* p < 0.05; \*\*\* p < 0.01

Note: Shown are results from Oaxaca decompositions of the employment gap between the indicated group and 3<sup>rd</sup>+ generation non-Hispanic whites. Models also include 25 age dummy variables and 264 time effects.

**Online Appendix Table A3: Detailed Results for Table 6**  
**Decomposition Results for Employment Gap between Groups of Hispanics**

|                                     | Immigrants          |            | Immigrants               |           | 2 <sup>nd</sup> Generation |            |
|-------------------------------------|---------------------|------------|--------------------------|-----------|----------------------------|------------|
|                                     | US Citizen (v. Not) |            | Child Arrival (v. Adult) |           | One FB Parent (v. Two)     |            |
|                                     | Men                 | Women      | Men                      | Women     | Men                        | Women      |
| Employment gap                      | -0.002              | 0.174***   | -0.009***                | 0.105***  | -0.022***                  | -0.016*    |
| Due to differences in means:        |                     |            |                          |           |                            |            |
| Age                                 | -0.008***           | 0.059***   | 0.014***                 | 0.022***  | -0.001                     | 0.001      |
| Education                           | -0.018***           | -0.006***  | 0.014***                 | -0.007*** | -0.013***                  | -0.008***  |
| Less than HS diploma                | 0.007***            | 0.039***   | 0.004***                 | 0.030***  | -0.0003                    | -0.006*    |
| HS diploma                          | 0.005***            | 0.027***   | 0.004***                 | 0.022***  | -0.001                     | -0.005***  |
| Some college                        | -0.0001             | -0.0005*** | -0.0001                  | -0.001**  | 0.0002                     | 0.0003**   |
| College graduate                    | -0.0001             | 0.006***   | 0.0002                   | 0.006***  | 0.0002                     | 0.0001     |
| Marital status and kids             | 0.002***            | 0.007***   | 0.001***                 | 0.003***  | 0.001                      | -0.002     |
| Married                             | 0.005***            | 0.027***   | -0.004***                | 0.001     | 0.008***                   | 0.009***   |
| Divorced                            | 0.003***            | 0.002*     | -0.003***                | 0.007***  | 0.004**                    | -0.0001    |
| Widowed                             | 0.0002              | 0.004***   | 0.0001                   | 0.001***  | 0.0004                     | 0.002***   |
| Separated                           | -0.0001             | -0.0003*** | 0.0001**                 | 0.0005*** | -0.0001                    | -0.0004*** |
| Never married                       | -0.0001             | -0.001**   | -0.0001                  | -0.001*** | 0.0001                     | 0.0002     |
| Number of kids age 6+ at home       | 0.0004              | -0.001***  | -0.0003                  | 0.001***  | 0.004***                   | 0.0005     |
| Number of kids under age 6 at home  | 0.001***            | 0.002***   | -0.001***                | 0.001***  | 0.001**                    | -0.001***  |
| Economic conditions                 | -0.0003**           | 0.022***   | 0.0002**                 | -0.009*** | -0.001**                   | 0.007***   |
| Unemployment rate                   | -0.001***           | -0.002**   | -0.001*                  | -0.003*** | 0.004***                   | 0.006***   |
| Unemployment rate                   | -0.002***           | -0.001     | -0.002**                 | -0.001    | 0.003***                   | 0.001**    |
| Due to differences in coefficients: |                     |            |                          |           |                            |            |
| Age                                 | 0.006**             | 0.115***   | -0.022***                | 0.083***  | -0.021***                  | -0.017**   |
| Education                           | -0.0001             | -0.002***  | 0.001                    | 0.006**   | 0.001                      | 0.003      |
| Less than HS diploma                | -0.007***           | -0.012***  | -0.007***                | -0.015*** | 0.001                      | 0.001*     |
| HS diploma                          | -0.008***           | -0.014***  | -0.009***                | -0.025*** | -0.003*                    | -0.003***  |
| Some college                        | -0.004***           | -0.007***  | -0.002                   | -0.003    | -0.001                     | 0.003      |
| College graduate                    | 0.0005              | 0.0001     | 0.0004                   | 0.003***  | 0.004**                    | -0.001     |
| College graduate                    | 0.004***            | 0.009***   | 0.002***                 | 0.009***  | 0.001                      | 0.002*     |

|                                    |          |           |         |          |           |           |
|------------------------------------|----------|-----------|---------|----------|-----------|-----------|
| Marital status and kids            | 0.022**  | 0.068***  | 0.029*  | 0.056*** | 0.020     | -0.010    |
| Married                            | 0.012*   | 0.043***  | 0.014** | 0.026*** | 0.024***  | -0.005    |
| Divorced                           | 0.001    | -0.001    | 0.001   | -0.001   | 0.003**   | 0.001     |
| Widowed                            | -0.0001  | 0.0002    | -0.0002 | -0.0002  | -0.0003*  | 0.001***  |
| Separated                          | -0.0002  | -0.003*** | -0.0002 | -0.0003  | 0.0003    | -0.003*** |
| Never married                      | -0.003*  | -0.002    | -0.002  | -0.003*  | 0.002     | -0.0003   |
| Number of kids age 6+ at home      | 0.009*** | 0.021***  | 0.004** | 0.019*** | -0.003    | 0.006     |
| Number of kids under age 6 at home | 0.001*** | 0.008**   | 0.001   | 0.015*** | -0.005**  | -0.010*** |
| Economic conditions                | 0.004    | 0.045     | -0.0004 | 0.012    | 0.045**   | -0.035    |
| Unemployment rate                  | 0.005    | 0.045     | 0.043   | 0.015    | 0.048**   | -0.035    |
| Constant                           | -0.012   | 0.016     | -0.044* | 0.024    | -0.088*** | 0.023     |

\*  $p < 0.1$ ; \*\*  $p < 0.05$ ; \*\*\*  $p < 0.01$

Note: Shown are results from Oaxaca decompositions of the employment gap. Columns 1 and 2 compare Hispanic immigrants who are naturalized citizens with those who are not. Columns 3 and 4 compare Hispanics who immigrated when age 15 or younger (“child arrival”) with those who were age 16 or older (“adult arrival”). Columns 5 and 6 compare second-generation Hispanics with one foreign-born parent with those with two foreign-born parents.

**Online Appendix Table A4: Detailed Results for Table 8**  
**Decomposition Results for Employment Gap among Hispanics aged 25-34 across**  
**Immigrant Generations and Time Periods**

|                                     | Men                                        |                                              | Women                                      |                                              |
|-------------------------------------|--------------------------------------------|----------------------------------------------|--------------------------------------------|----------------------------------------------|
|                                     | 2 <sup>nd</sup> gen. (v. 1 <sup>st</sup> ) | 3 <sup>rd</sup> + gen. (v. 2 <sup>nd</sup> ) | 2 <sup>nd</sup> gen. (v. 1 <sup>st</sup> ) | 3 <sup>rd</sup> + gen. (v. 2 <sup>nd</sup> ) |
| Employment gap                      | -0.043***                                  | -0.068***                                    | 0.229***                                   | -0.030*                                      |
| Due to differences in means:        |                                            |                                              |                                            |                                              |
| Age                                 | 0.010*                                     | 0.009                                        | 0.158***                                   | 0.071***                                     |
| Education                           | -0.002*                                    | 0.001                                        | -0.009***                                  | 0.002                                        |
| Less than HS diploma                | 0.025***                                   | 0.011*                                       | 0.101***                                   | 0.024***                                     |
| HS diploma                          | 0.018***                                   | 0.011***                                     | 0.066***                                   | 0.015***                                     |
| Some college                        | -0.002**                                   | -0.0004                                      | -0.0004                                    | -0.0002                                      |
| College graduate                    | 0.002                                      | 0.002**                                      | 0.014***                                   | 0.001                                        |
| Marital status and kids             | 0.007***                                   | -0.001                                       | 0.021***                                   | 0.009*                                       |
| Married                             | -0.021***                                  | -0.024***                                    | 0.060***                                   | 0.017***                                     |
| Divorced                            | -0.013***                                  | -0.015**                                     | 0.014***                                   | 0.006                                        |
| Widowed                             | 0.0001                                     | -0.0001                                      | 0.001                                      | -0.001                                       |
| Separated                           | -0.0001                                    | 0.0001                                       | 0.0002                                     | 0.0002                                       |
| Never married                       | -0.0001                                    | -0.001                                       | -0.0001                                    | 0.0004                                       |
| Number kids age 6+                  | -0.010**                                   | -0.007                                       | 0.001                                      | 0.004                                        |
| Number kids under age 6             | -0.002***                                  | -0.001                                       | 0.012***                                   | 0.0001                                       |
| Economic conditions                 | -0.001                                     | -0.001                                       | 0.033***                                   | 0.007***                                     |
| Constant                            | 0.008                                      | 0.021**                                      | 0.007                                      | 0.029*                                       |
| Due to differences in coefficients: |                                            |                                              |                                            |                                              |
| Age                                 | -0.053***                                  | -0.077***                                    | 0.071***                                   | -0.102***                                    |
| Education                           | 0.002                                      | -0.0001                                      | 0.001                                      | -0.001                                       |
| Less than HS diploma                | -0.009***                                  | 0.004                                        | -0.007**                                   | -0.016***                                    |
| HS diploma                          | -0.019***                                  | -0.010***                                    | -0.014**                                   | 0.003                                        |
| Some college                        | -0.007***                                  | -0.001                                       | -0.011***                                  | -0.0002                                      |
| College graduate                    | 0.007***                                   | 0.006                                        | 0.004                                      | -0.031***                                    |
| Marital status and kids             | 0.010***                                   | 0.010***                                     | 0.014***                                   | 0.013*                                       |
| Married                             | 0.063                                      | 0.095**                                      | 0.055                                      | 0.071                                        |
| Divorced                            | 0.037*                                     | 0.029                                        | 0.003                                      | 0.003                                        |
| Widowed                             | 0.003**                                    | -0.001                                       | 0.001                                      | 0.002                                        |
| Separated                           | -0.0002                                    | 0.0001                                       | -0.0003                                    | -0.001                                       |
| Never married                       | -0.0003                                    | -0.002*                                      | 0.004                                      | 0.002                                        |
| Number kids age 6+                  | 0.006                                      | -0.046**                                     | -0.001                                     | 0.030                                        |
| Number kids under age 6             | 0.003                                      | 0.012                                        | 0.022                                      | 0.021                                        |
| Economic conditions                 | 0.015***                                   | 0.010**                                      | 0.027***                                   | 0.013                                        |
| Constant                            | -0.008                                     | -0.146***                                    | -0.004                                     | -0.112*                                      |
| Constant                            | -0.100                                     | -0.030                                       | 0.026                                      | -0.044                                       |

\* p < 0.1; \*\* p < 0.05; \*\*\* p < 0.01

Note: Shown are results from Oaxaca decompositions of the employment gap between the indicated groups. All observations are Hispanics aged 25-34. The earlier generation is from the 1996-1997 CPS, and the later generation is from the 2016-2017 CPS.

**Online Appendix Table A5: Detailed Results for Table 10**  
**Decomposition Results for Male Employment Gap Relative to Non-Hispanic Whites in**  
**NLSY97**

|                                     | Hispanic<br>Immigrants | Hispanic<br>2 <sup>nd</sup> gen. | Hispanic<br>3 <sup>rd</sup> gen. | Hispanic<br>4 <sup>th</sup> + gen. | Non-Hispanic<br>Blacks |
|-------------------------------------|------------------------|----------------------------------|----------------------------------|------------------------------------|------------------------|
| Employment gap                      | 0.050***               | -0.044                           | -0.021                           | -0.096***                          | -0.162***              |
| Due to differences in means:        | -0.040**               | -0.032***                        | -0.029***                        | -0.031***                          | -0.041***              |
| Age                                 | -0.001                 | 0.001                            | 0.0003                           | 0.0001                             | 0.0003                 |
| Education                           | -0.022***              | -0.018***                        | -0.012**                         | -0.023***                          | -0.025***              |
| Less than HS diploma                | -0.008*                | -0.005**                         | -0.001                           | -0.008**                           | -0.006**               |
| HS diploma                          | -0.0001                | 0.0001                           | -0.0004                          | 0.0005                             | -0.002                 |
| Some college                        | 0.0001                 | 0.0006                           | 0.001                            | -0.001                             | 0.001                  |
| College graduate                    | -0.014***              | -0.013***                        | -0.012***                        | -0.014***                          | -0.017***              |
| Marital status and kids             | -0.003                 | -0.008*                          | -0.010*                          | -0.007*                            | -0.014***              |
| Married                             | -0.002                 | -0.005                           | -0.005                           | -0.008**                           | -0.007                 |
| Divorced                            | -0.0001                | 0.0004                           | 0.0003                           | -0.0001                            | 0.0003                 |
| Widowed                             | --                     | 0.0002                           | --                               | --                                 | 0.0004                 |
| Separated                           | -0.0002                | -0.0005                          | --                               | 0.0003                             | 0.0001                 |
| Never married                       | 0.0002                 | -0.003                           | -0.003                           | 0.001                              | -0.006                 |
| Number kids age 6+                  | -0.002                 | -0.0004                          | -0.001                           | -0.0002                            | 0.001                  |
| Number kids under age 6             | 0.0003                 | 0.0001                           | -0.0002                          | 0.0002                             | -0.002                 |
| Economic conditions                 | -0.014                 | -0.007                           | -0.007                           | -0.001                             | -0.003                 |
| Due to differences in coefficients: | 0.090***               | -0.012                           | 0.008                            | -0.065***                          | -0.121***              |
| Age                                 | -0.014                 | 0.005                            | 0.042**                          | 0.010                              | -0.065                 |
| Education                           | 0.001                  | 0.010                            | 0.043***                         | 0.016                              | -0.006                 |
| Less than HS diploma                | 0.003                  | -0.007                           | -0.009*                          | -0.017**                           | -0.017***              |
| HS diploma                          | -0.004                 | 0.011                            | 0.016                            | 0.007                              | -0.047***              |
| Some college                        | 0.004                  | 0.001                            | 0.038**                          | 0.015*                             | 0.032***               |
| College graduate                    | -0.002                 | 0.005                            | -0.002                           | 0.011                              | -0.026***              |
| Marital status and kids             | 0.010                  | -0.006                           | -0.075**                         | 0.020                              | 0.063*                 |
| Married                             | 0.0005                 | 0.001                            | -0.023*                          | 0.010                              | -0.001                 |
| Divorced                            | -0.019**               | -0.004                           | 0.008                            | -0.003                             | -0.001                 |
| Widowed                             | --                     | -0.0001                          | --                               | --                                 | 0.0001                 |
| Separated                           | 0.004                  | 0.002                            | --                               | 0.0004                             | -0.001                 |
| Never married                       | 0.012                  | -0.008                           | -0.053**                         | -0.008                             | 0.027                  |
| Number kids age 6+                  | 0.036***               | 0.008                            | -0.007                           | 0.011                              | 0.016**                |
| Number kids under age 6             | -0.022*                | -0.004                           | 0.001                            | 0.010                              | 0.024***               |
| Economic conditions                 | 0.052                  | 0.430***                         | 0.127                            | 0.018                              | 0.096                  |
| Constant                            | 0.041                  | -0.453***                        | -0.127                           | -0.129                             | -0.209**               |

\* p < 0.1; \*\* p < 0.05; \*\*\* p < 0.01

Note: Shown are results from Oaxaca decompositions of the employment gap between the indicated group and 3<sup>rd</sup>+ generation non-Hispanic whites.

**Online Appendix Table A6: Detailed Results for Table 11**  
**Decomposition Results for Female Employment Gap Relative to Non-Hispanic Whites in**  
**NLSY97**

|                                     | Hispanic<br>Immigrants | Hispanic<br>2 <sup>nd</sup> gen. | Hispanic<br>3 <sup>rd</sup> gen. | Hispanic<br>4 <sup>th</sup> + gen. | Non-Hispanic<br>Blacks |
|-------------------------------------|------------------------|----------------------------------|----------------------------------|------------------------------------|------------------------|
| Employment gap                      | -0.105***              | -0.033                           | -0.008                           | -0.079***                          | -0.081***              |
| Due to differences in means:        | -0.154***              | -0.075***                        | -0.043**                         | -0.066***                          | -0.055***              |
| Age                                 | 0.001                  | 0.001                            | -0.0004                          | 0.002                              | 0.001                  |
| Education                           | -0.089***              | -0.037***                        | -0.032***                        | -0.058***                          | -0.040***              |
| Less than HS diploma                | -0.039***              | -0.009**                         | -0.003                           | -0.015***                          | -0.007**               |
| HS diploma                          | -0.003                 | -0.002                           | -0.003                           | -0.004                             | -0.002                 |
| Some college                        | -0.001                 | 0.009***                         | 0.004                            | 0.002                              | 0.011***               |
| College graduate                    | -0.046***              | -0.035***                        | -0.029***                        | -0.041***                          | -0.042***              |
| Marital status and kids             | -0.044***              | -0.023                           | 0.006                            | -0.009                             | -0.010                 |
| Married                             | 0.003                  | 0.004                            | 0.003                            | 0.003                              | 0.016                  |
| Divorced                            | 0.001                  | 0.0002                           | 0.001                            | -0.0001                            | 0.001                  |
| Widowed                             | --                     | -0.0001                          | --                               | --                                 | -0.0001                |
| Separated                           | -0.0001                | 0.001                            | 0.003                            | 0.001                              | -0.001                 |
| Never married                       | -0.002                 | -0.002                           | -0.002                           | -0.0002                            | -0.012                 |
| Number kids age 6+                  | -0.024**               | -0.012*                          | -0.004                           | -0.009**                           | -0.010                 |
| Number kids under age 6             | -0.022***              | -0.013                           | 0.006                            | -0.003                             | -0.005                 |
| Economic conditions                 | -0.021                 | -0.016                           | -0.017                           | -0.001                             | -0.006                 |
| Due to differences in coefficients: | 0.049                  | 0.042*                           | 0.035                            | -0.013                             | -0.026                 |
| Age                                 | 0.008                  | 0.009                            | 0.054**                          | 0.164***                           | 0.018*                 |
| Education                           | 0.006                  | -0.025*                          | -0.076***                        | -0.004                             | 0.002                  |
| Less than HS diploma                | 0.050***               | 0.014***                         | 0.022**                          | 0.005                              | -0.002                 |
| HS diploma                          | 0.007                  | 0.001                            | -0.037**                         | 0.006                              | -0.012                 |
| Some college                        | -0.025***              | -0.007                           | -0.020                           | -0.012                             | 0.001                  |
| College graduate                    | -0.026***              | -0.032***                        | -0.041***                        | -0.003                             | 0.014                  |
| Marital status and kids             | -0.052                 | -0.079                           | 0.028                            | 0.100**                            | -0.004                 |
| Married                             | -0.043                 | -0.066**                         | 0.006                            | 0.024                              | -0.026                 |
| Divorced                            | 0.012**                | 0.004                            | 0.008                            | 0.003                              | 0.001                  |
| Widowed                             | --                     | 0.0002                           | --                               | --                                 | 0.0003                 |
| Separated                           | -0.001                 | 0.001                            | -0.007                           | -0.007*                            | -0.001                 |
| Never married                       | -0.012                 | -0.013                           | -0.023                           | 0.044**                            | -0.054                 |
| Number kids age 6+                  | -0.060**               | -0.014                           | 0.013                            | -0.002                             | 0.027*                 |
| Number kids under age 6             | 0.053***               | 0.010                            | 0.030*                           | 0.038*                             | 0.047***               |
| Economic conditions                 | 0.131                  | 0.027                            | -0.106                           | 0.255*                             | -0.043                 |
| Constant                            | -0.045                 | 0.110                            | 0.135                            | -0.528                             | 0.0003                 |

\* p < 0.1; \*\* p < 0.05; \*\*\* p < 0.01

Note: Shown are results from Oaxaca decompositions of the employment gap between the indicated group and 3<sup>rd</sup>+ generation non-Hispanic whites.

**Online Appendix Table A7: Table 2 Estimated Using Probit instead of OLS  
Decomposition Results for Male Employment Gap Relative to Non-Hispanic Whites**

|                                     | Hispanic<br>Immigrants | Hispanic<br>2 <sup>nd</sup> gen. | Hispanic<br>3 <sup>rd</sup> + gen. | Non-Hispanic<br>Blacks |
|-------------------------------------|------------------------|----------------------------------|------------------------------------|------------------------|
| Employment gap                      | 0.018***               | -0.021***                        | -0.067***                          | -0.142***              |
| Due to differences in means:        |                        |                                  |                                    |                        |
| Age                                 | -0.039***              | -0.027***                        | -0.039***                          | -0.063***              |
| Education                           | 0.010***               | 0.019***                         | 0.012***                           | 0.007***               |
| Marital status and kids             | -0.051***              | -0.023***                        | -0.035***                          | -0.034***              |
| Economic conditions                 | 0.008***               | -0.012***                        | -0.009***                          | -0.032***              |
| Economic conditions                 | -0.006***              | -0.011**                         | -0.006**                           | -0.004**               |
| Due to differences in coefficients: |                        |                                  |                                    |                        |
| Age                                 | 0.057***               | 0.005                            | -0.028**                           | -0.078***              |
| Age                                 | 0.0001                 | -0.002                           | 0.0003                             | -0.0001                |
| Education                           | 0.030***               | -0.016                           | -0.002***                          | -0.002**               |
| Marital status and kids             | -0.041***              | -0.073                           | -0.012***                          | -0.015***              |
| Economic conditions                 | 0.013                  | 0.221                            | 0.032                              | -0.013                 |
| Constant                            | 0.054***               | -0.125                           | -0.046*                            | -0.049**               |

\*  $p < 0.1$ ; \*\*  $p < 0.05$ ; \*\*\*  $p < 0.01$

Note: Shown are results from Oaxaca decompositions of the employment gap between the indicated group and 3<sup>rd</sup>+ generation non-Hispanic whites (see text for details).

**Online Appendix Table A8: Table 3 Estimated Using Probit instead of OLS  
Decomposition Results for Female Employment Gap Relative to Non-Hispanic Whites**

|                                     | Hispanic<br>Immigrants | Hispanic<br>2 <sup>nd</sup> gen. | Hispanic<br>3 <sup>rd</sup> + gen. | Non-Hispanic<br>Blacks |
|-------------------------------------|------------------------|----------------------------------|------------------------------------|------------------------|
| Employment gap                      | -0.183***              | -0.032***                        | -0.070***                          | -0.047***              |
| Due to differences in means:        |                        |                                  |                                    |                        |
| Age                                 | -0.151***              | -0.048***                        | -0.059***                          | -0.033***              |
| Education                           | 0.011***               | 0.019***                         | 0.010***                           | 0.005***               |
| Marital status and kids             | -0.122***              | -0.035***                        | -0.054***                          | -0.034***              |
| Economic conditions                 | -0.029***              | -0.019***                        | -0.010***                          | -0.001                 |
| Economic conditions                 | -0.011**               | -0.013**                         | -0.006*                            | -0.004**               |
| Due to differences in coefficients: |                        |                                  |                                    |                        |
| Age                                 | -0.032***              | 0.016***                         | -0.011                             | -0.014**               |
| Education                           | -0.003***              | -0.004**                         | 0.0001                             | 0.0002                 |
| Marital status and kids             | 0.012**                | -0.004***                        | -0.002***                          | -0.004***              |
| Economic conditions                 | -0.048***              | 0.006                            | 0.015**                            | 0.043***               |
| Economic conditions                 | 0.069**                | 0.086***                         | 0.047                              | -0.001                 |
| Constant                            | -0.063**               | -0.067**                         | -0.071                             | -0.052                 |

\*  $p < 0.1$ ; \*\*  $p < 0.05$ ; \*\*\*  $p < 0.01$

Note: Shown are results from Oaxaca decompositions of the employment gap between the indicated group and 3<sup>rd</sup>+ generation non-Hispanic whites (see text for details).

**Online Appendix Table A9: Table 6 Estimated Using Probit instead of OLS  
Decomposition Results for Employment Gap between Groups of Hispanics**

|                                     | Immigrants          |           | Immigrants               |           | 2 <sup>nd</sup> Generation |           |
|-------------------------------------|---------------------|-----------|--------------------------|-----------|----------------------------|-----------|
|                                     | US Citizen (v. Not) |           | Child Arrival (v. Adult) |           | One FB Parent (v. Two)     |           |
|                                     | Men                 | Women     | Men                      | Women     | Men                        | Women     |
| Employment gap                      | -0.002              | 0.174***  | -0.009***                | 0.105***  | -0.022***                  | -0.016*   |
| Due to differences in means:        | -0.007***           | 0.060***  | 0.013***                 | 0.022***  | -0.002                     | 0.001     |
| Age                                 | -0.021***           | -0.007*** | 0.013***                 | -0.007*** | -0.031                     | -0.007*** |
| Education                           | 0.008***            | 0.040***  | 0.005***                 | 0.031***  | -0.0001                    | -0.005*   |
| Marital status and kids             | 0.006***            | 0.029***  | -0.004***                | 0.002     | 0.018                      | 0.008***  |
| Economic conditions                 | -0.001              | -0.002*** | -0.001*                  | -0.003*** | 0.011                      | 0.005***  |
| Due to differences in coefficients: | 0.006**             | 0.113***  | -0.022***                | 0.083***  | -0.021***                  | -0.017**  |
| Age                                 | 0.0004              | -0.002**  | -0.0003                  | 0.006**   | -0.001                     | 0.004     |
| Education                           | -0.005***           | -0.013*** | -0.009***                | -0.017*** | 0.001                      | 0.001     |
| Marital status and kids             | 0.013***            | 0.058***  | 0.026**                  | 0.048***  | 0.011                      | -0.008    |
| Economic conditions                 | 0.0003              | 0.041     | 0.002                    | 0.007     | 0.045*                     | -0.038    |
| Constant                            | -0.003              | 0.029     | -0.041**                 | 0.038     | -0.078***                  | 0.024     |

\* p < 0.1; \*\* p < 0.05; \*\*\* p < 0.01

Note: Shown are results from Oaxaca decompositions of the employment gap. Columns 1 and 2 compare Hispanic immigrants who are naturalized citizens with those who are not. Columns 3 and 4 compare Hispanics who immigrated when age 15 or younger (“child arrival”) with those who were age 16 or older (“adult arrival”). Columns 5 and 6 compare second-generation Hispanics with one foreign-born parent with those with two foreign-born parents.

**Online Appendix Table A10: Table 8 Estimated Using Probit instead of OLS  
Decomposition Results for Employment Gap among Hispanics aged 25-34 across  
Immigrant Generations and Time Periods**

|                                     | Men                                        |                                              | Women                                      |                                              |
|-------------------------------------|--------------------------------------------|----------------------------------------------|--------------------------------------------|----------------------------------------------|
|                                     | 2 <sup>nd</sup> gen. (v. 1 <sup>st</sup> ) | 3 <sup>rd</sup> + gen. (v. 2 <sup>nd</sup> ) | 2 <sup>nd</sup> gen. (v. 1 <sup>st</sup> ) | 3 <sup>rd</sup> + gen. (v. 2 <sup>nd</sup> ) |
| Employment gap                      | -0.043***                                  | -0.068***                                    | 0.229***                                   | -0.030*                                      |
| Due to differences in means:        |                                            |                                              |                                            |                                              |
| Age                                 | 0.012*                                     | 0.009                                        | 0.157***                                   | 0.077***                                     |
| Education                           | -0.002**                                   | 0.001                                        | -0.009***                                  | 0.002                                        |
| Marital status and kids             | 0.029***                                   | 0.012                                        | 0.099***                                   | 0.025***                                     |
| Economic conditions                 | -0.023***                                  | -0.034***                                    | 0.060***                                   | 0.018***                                     |
| Due to differences in coefficients: |                                            |                                              |                                            |                                              |
| Age                                 | 0.009                                      | 0.031**                                      | 0.007                                      | 0.032*                                       |
| Education                           | -0.056***                                  | -0.078***                                    | 0.072***                                   | -0.107***                                    |
| Marital status and kids             | 0.002                                      | -0.0002                                      | 0.001                                      | -0.001                                       |
| Economic conditions                 | -0.017***                                  | 0.001                                        | -0.008**                                   | -0.017***                                    |
| Constant                            | 0.059                                      | 0.081***                                     | 0.043                                      | 0.071                                        |
|                                     | -0.002                                     | -0.106*                                      | -0.016                                     | -0.102*                                      |
|                                     | -0.098                                     | -0.053                                       | 0.053                                      | -0.058                                       |

\* p < 0.1; \*\* p < 0.05; \*\*\* p < 0.01

Note: Shown are results from Oaxaca decompositions of the employment gap between the indicated groups. All observations are Hispanics aged 25-34. The earlier generation is from the 1996-1997 CPS, and the later generation is from the 2016-2017 CPS.

**Online Appendix Table A11: Table 10 Estimated Using Probit instead of OLS  
Decomposition Results for Male Employment Gap Relative to Non-Hispanic Whites in  
NLSY97**

|                                     | Hispanic<br>Immigrants | Hispanic<br>2 <sup>nd</sup> gen. | Hispanic<br>3 <sup>rd</sup> gen. | Hispanic<br>4 <sup>th</sup> + gen. | Non-Hispanic<br>Blacks |
|-------------------------------------|------------------------|----------------------------------|----------------------------------|------------------------------------|------------------------|
| Employment gap                      | 0.050***               | -0.044                           | -0.021                           | -0.096***                          | -0.162***              |
| Due to differences in means:        | -0.023                 | -0.036***                        | -0.029***                        | -0.039***                          | -0.059***              |
| Age                                 | -0.001                 | 0.001                            | 0.0003                           | 0.0003                             | 0.001                  |
| Education                           | -0.007*                | -0.019***                        | -0.012**                         | -0.027***                          | -0.034***              |
| Marital status and kids             | -0.003                 | -0.009**                         | -0.010*                          | -0.010*                            | -0.022***              |
| Economic conditions                 | -0.011                 | -0.008                           | -0.007                           | -0.002                             | -0.004                 |
| Due to differences in coefficients: | 0.073***               | -0.007                           | 0.008                            | -0.058***                          | -0.103***              |
| Age                                 | -0.069***              | -0.012                           | 0.038                            | 0.009                              | -0.054                 |
| Education                           | 0.002                  | -0.038                           | 0.040                            | 0.012                              | -0.013                 |
| Marital status and kids             | 0.049***               | 0.087                            | -0.092                           | 0.013                              | 0.076                  |
| Economic conditions                 | -0.007                 | -2.050                           | 0.089                            | 0.063                              | 0.157                  |
| Constant                            | 0.098                  | 2.017                            | -0.067                           | -0.154                             | -0.269*                |

\* p < 0.1; \*\* p < 0.05; \*\*\* p < 0.01

Note: Shown are results from Oaxaca decompositions of the employment gap between the indicated group and 3<sup>rd</sup>+ generation non-Hispanic whites.

**Online Appendix Table A12: Table 11 Estimated Using Probit instead of OLS  
Decomposition Results for Female Employment Gap Relative to Non-Hispanic Whites in  
NLSY97**

|                                     | Hispanic<br>Immigrants | Hispanic<br>2 <sup>nd</sup> gen. | Hispanic<br>3 <sup>rd</sup> gen. | Hispanic<br>4 <sup>th</sup> + gen. | Non-Hispanic<br>Blacks |
|-------------------------------------|------------------------|----------------------------------|----------------------------------|------------------------------------|------------------------|
| Employment gap                      | -0.104***              | -0.033                           | -0.010                           | -0.080***                          | -0.082***              |
| Due to differences in means:        | -0.154***              | -0.073***                        | -0.038**                         | -0.065***                          | -0.054***              |
| Age                                 | 0.001                  | 0.002                            | 0.001                            | 0.003                              | 0.001                  |
| Education                           | -0.089***              | -0.037***                        | -0.029**                         | -0.060***                          | -0.044***              |
| Marital status and kids             | -0.041***              | -0.020                           | 0.006                            | -0.007                             | -0.010                 |
| Economic conditions                 | -0.025                 | -0.017                           | -0.017                           | -0.001                             | -0.006                 |
| Due to differences in coefficients: | 0.050                  | 0.040                            | 0.029                            | -0.015                             | -0.028                 |
| Age                                 | 0.035                  | 0.032                            | 0.070                            | 0.035                              | 0.027**                |
| Education                           | 0.014                  | -0.018                           | -0.062                           | -0.002                             | 0.001                  |
| Marital status and kids             | -0.047                 | -0.050                           | 0.024                            | 0.065                              | 0.054                  |
| Economic conditions                 | 0.248                  | 0.039                            | -0.114                           | 0.199                              | -0.014                 |
| Constant                            | -0.201                 | 0.036                            | 0.112                            | -0.314                             | -0.095                 |

\*  $p < 0.1$ ; \*\*  $p < 0.05$ ; \*\*\*  $p < 0.01$

Note: Shown are results from Oaxaca decompositions of the employment gap between the indicated group and 3<sup>rd</sup>+ generation non-Hispanic whites.
